# Supplementary material for: Increased peripheral inflammatory responses in myelin oligodendrocyte glycoprotein associated disease and aquaporin-4 antibody positive neuromyelitis optica spectrum disorder
Source: PubMed Central journal article supplement (PMC9703059; doi:10.3389/fimmu.2022.1037812), 2022-11-14
Supplement: DataSheet_1.pdf [file DataSheet_1.pdf]

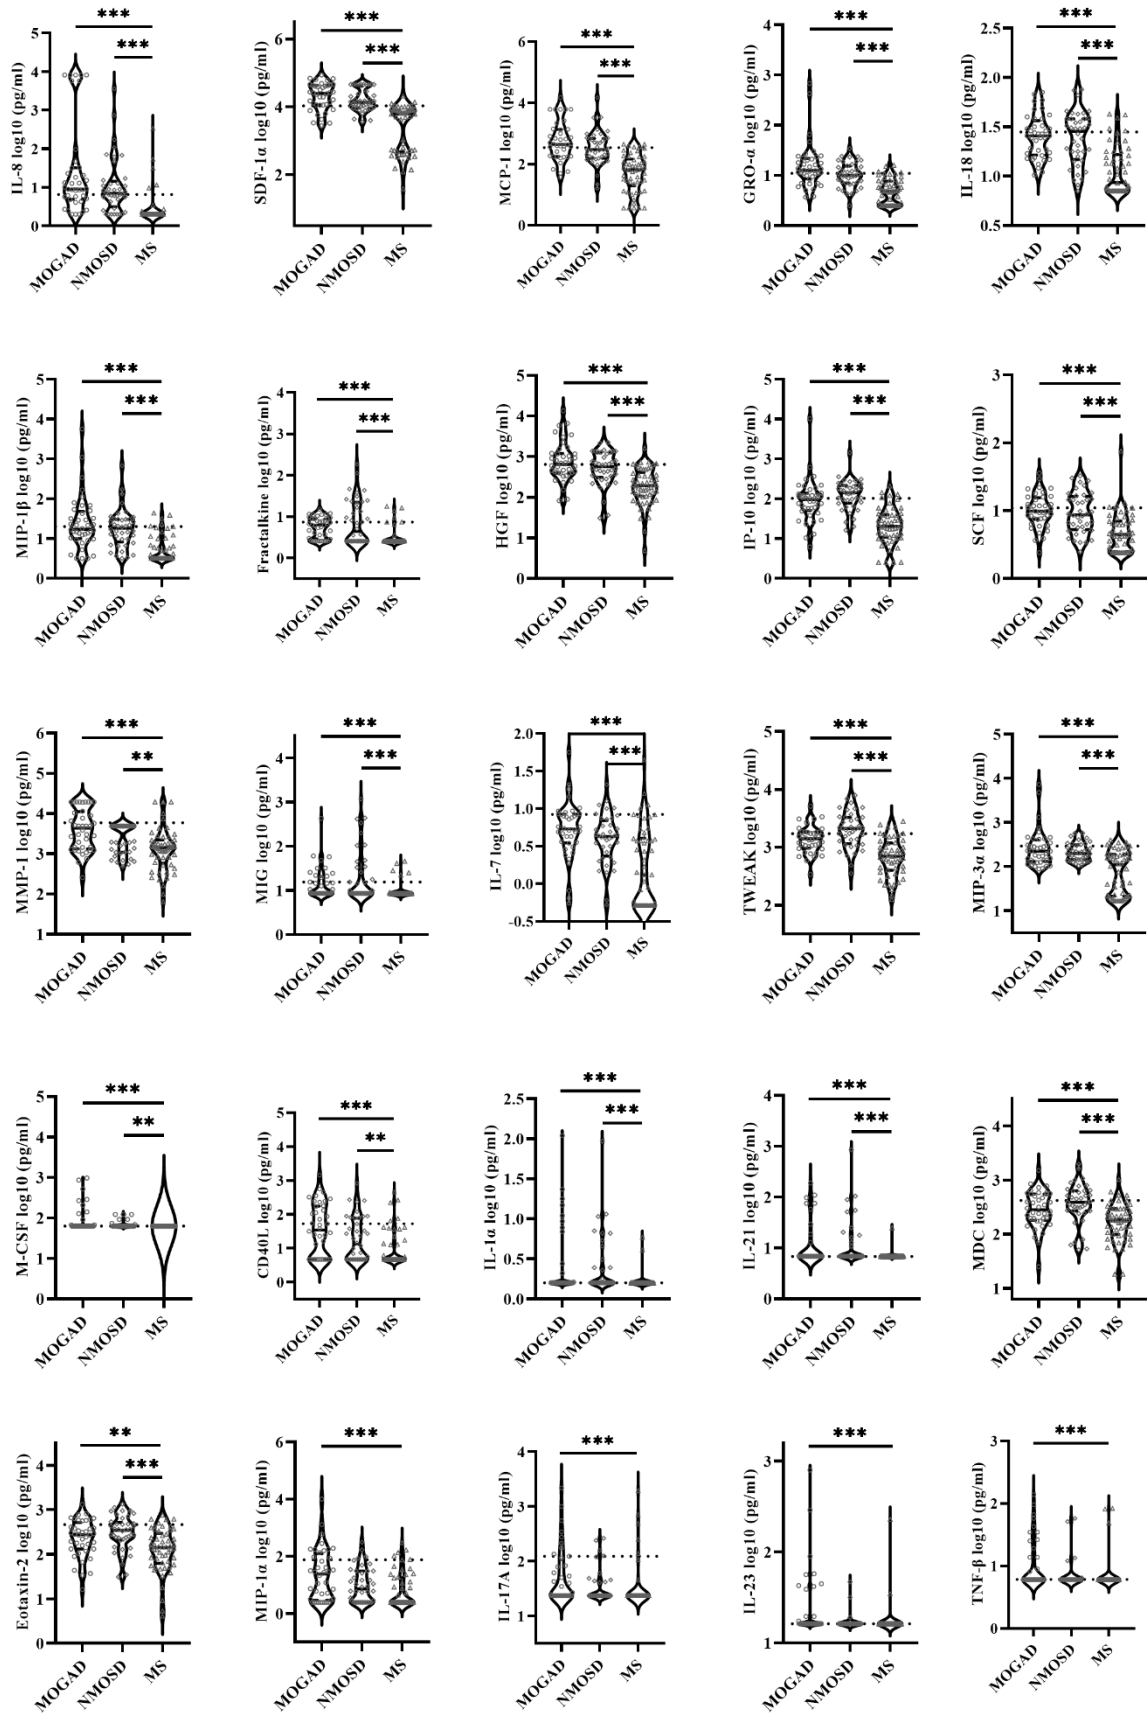

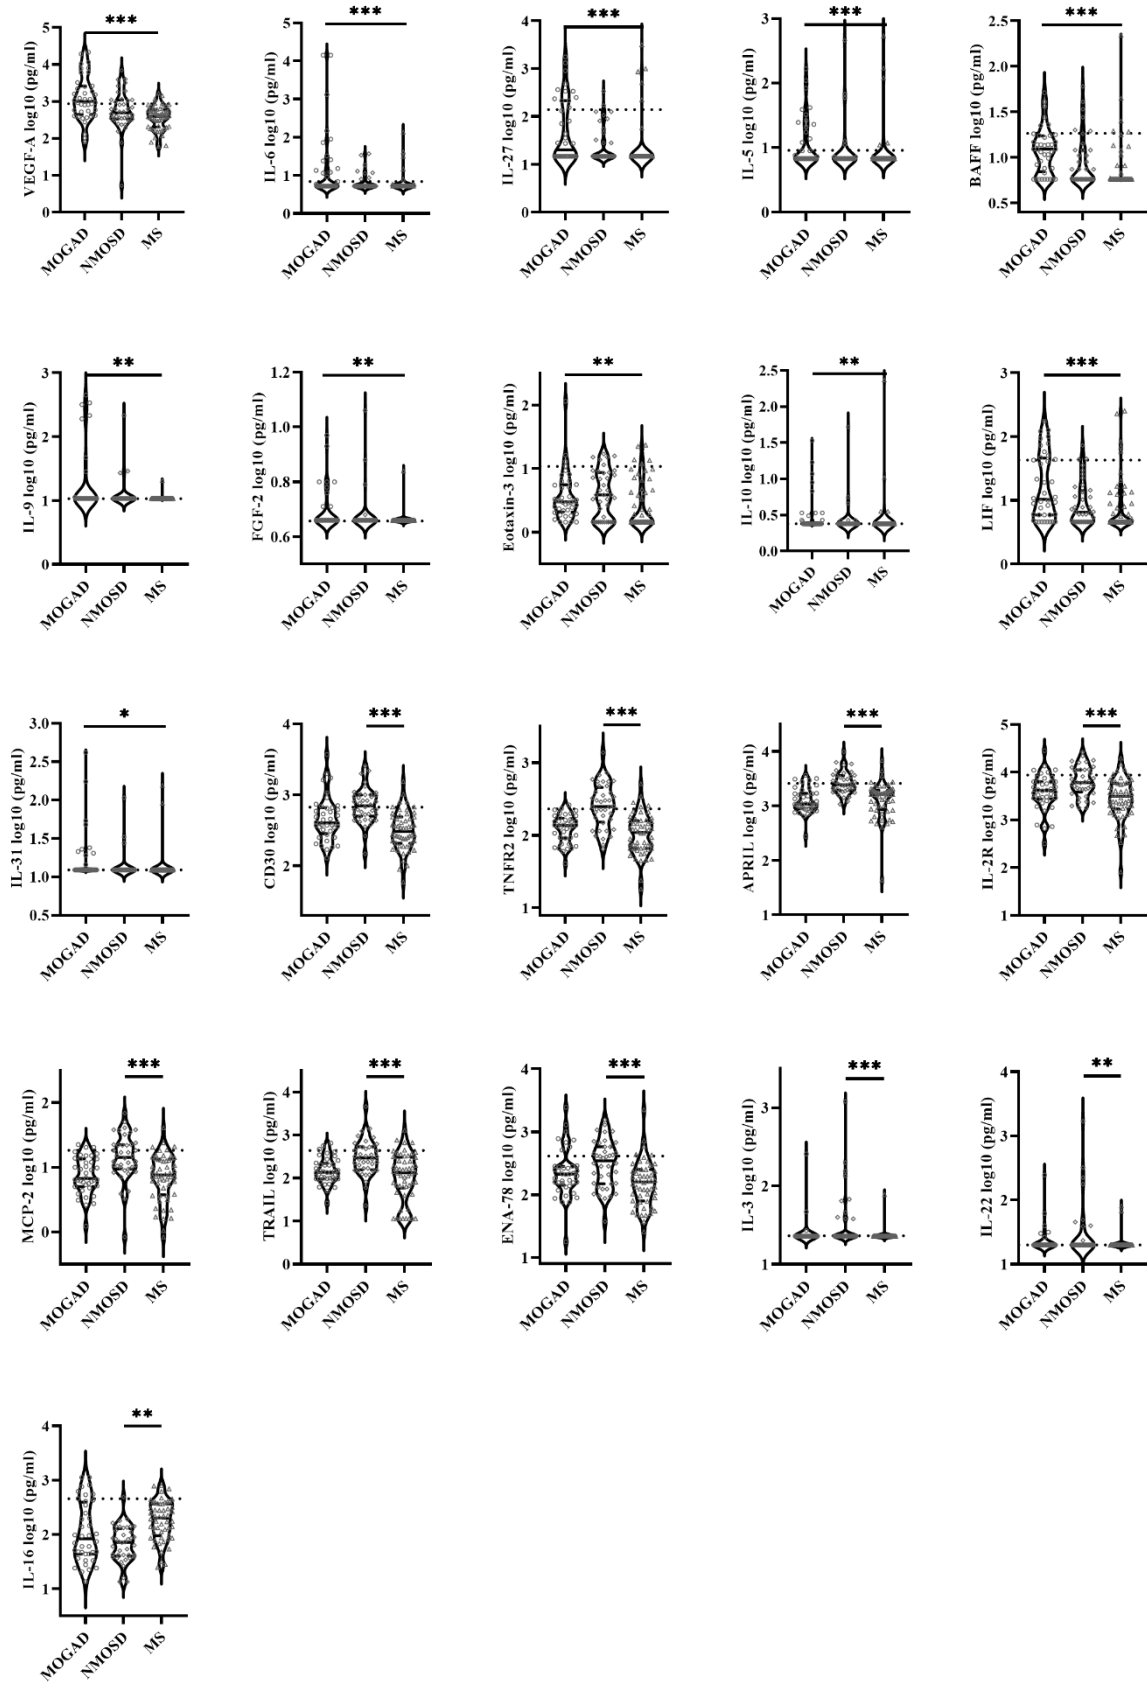

**Supplementary Figure 1. Violin plots of significantly altered cytokines and chemokines compared to multiple sclerosis (MS) patients.** Individual values for aquaporin-4 antibody positive neuromyelitis optica spectrum disorder (NMO/SD) patients, myelin oligodendrocyte

glycoprotein-associated disease (MOGAD) patients and MS patients are shown as circles, medians are shown as thick horizontal line and quartiles as dashed line. The long horizontal dotted lines represent the cut-off values to discriminate NMOSD and MOGAD from MS patients with 90% specificity. Between group comparisons, comparing MOGAD or NMOSD with MS, were calculated using Mann Whitney U test with two-stage step-up (Benjamini, Krieger and Yekutieli) and a false discovery rate (FDR) of 1%. Significant differences (MOGAD and NMOSD versus MS) are shown in the graphs, \*\*\* indicates a p-value <0.001, \*\* p-value <0.01, \* p-value <0.05.

APRIL: a proliferation-inducing ligand; BAFF: B cell activation factor; BLC: B lymphocyte chemoattractant; CD40L: CD40 ligand; ENA-78: epithelial neutrophil-activating peptide-78; FGF: fibroblast growth factor; G-CSF: granulocyte colony-stimulating factor; GM-CSF: granulocyte-macrophage colony-stimulating factor; GRO: growth-regulated oncogene; HGF: hepatocyte growth factor; IFN: interferon; IL: interleukin; IP: interferon- $\gamma$ -induced protein; I-TAC: interferon-inducible T cell  $\alpha$ -chemoattractant; LIF: leukemia inhibitory factor; MCP: monocyte chemoattractant protein; M-CSF: macrophage colony-stimulating factor; MDC: macrophage-derived chemokine; MIF: macrophage migration inhibitory factor; MIG: monokine induced by interferon- $\gamma$ ; MIP: macrophage inflammatory protein; MMP: matrix metalloproteinase; MOGAD: myelin oligodendrocyte glycoprotein associated disease; MS: multiple sclerosis; NGF: nerve growth factor; NMDAR: N-methyl-D-aspartate receptor; NMOSD: neuromyelitis optica spectrum disorder; SCF: stem cell factor; SDF: stromal cell-derived factor; TNF: tumor necrosis factor; TRAIL: TNF-related apoptosis-inducing ligand; TSLP: thymic stromal lymphopoietin; TWEAK: tumor necrosis factor-like weak inducer of apoptosis; VEGF: vascular endothelial growth factor

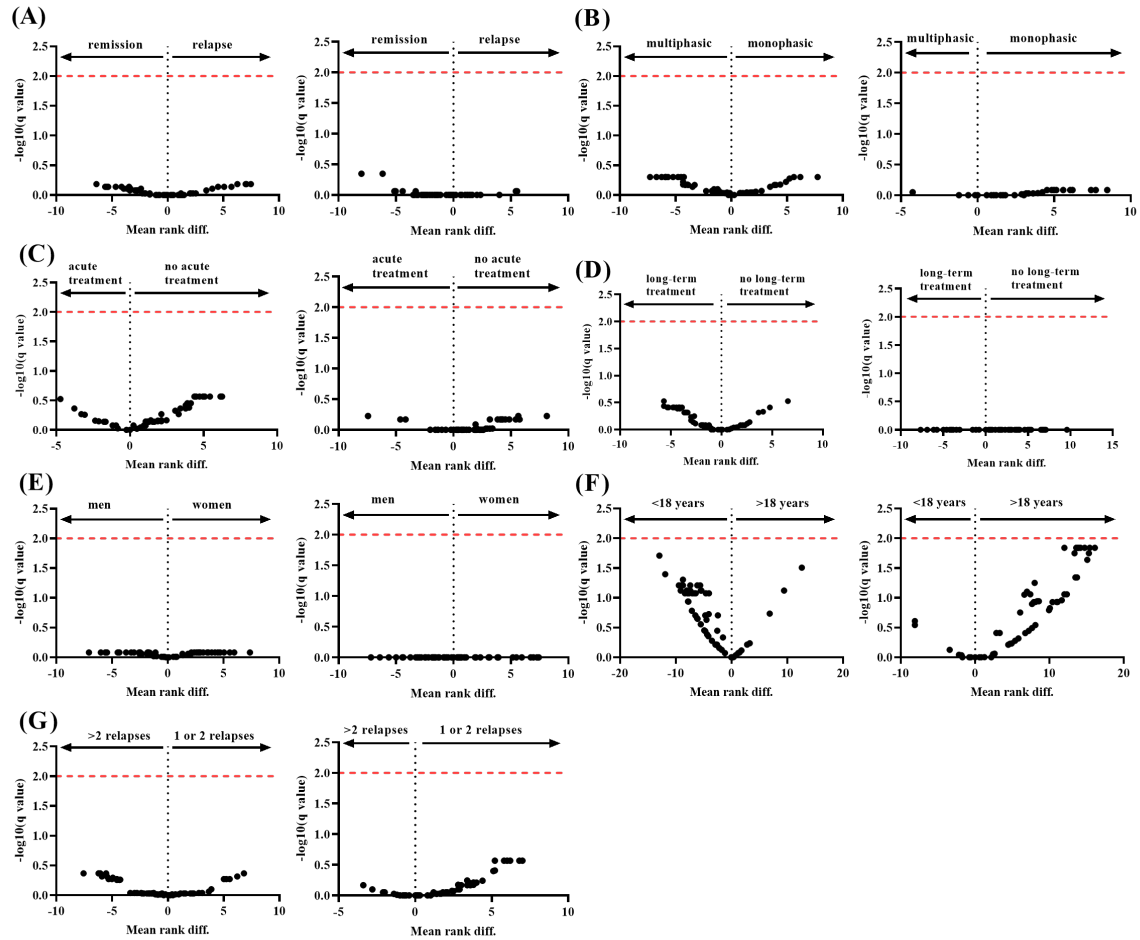

**Supplementary Figure 2. Clinical differences within MOGAD and NMOSD patients.** Volcano Plot of Mann-Whitney tests after two-stage step-up (Benjamini, Krieger and Yekutieli) and FDR of 1% correction for multiple comparisons showing levels of 65 cytokines, chemokines and related molecules in MOGAD (left) and NMOSD (right) patients **A** during remission or relapse. **B** comparing relapsing vs monophasic disease courses. **C** receiving acute treatment or not before sample was taken. **D** receiving long-term treatment or not. **E** comparing women with men. **F** comparing children aged younger 18 years with adults. **G** having a maximum of two relapses compared with those having at least three relapses. The red dotted line indicates the significance level of  $p < 0.05$ .

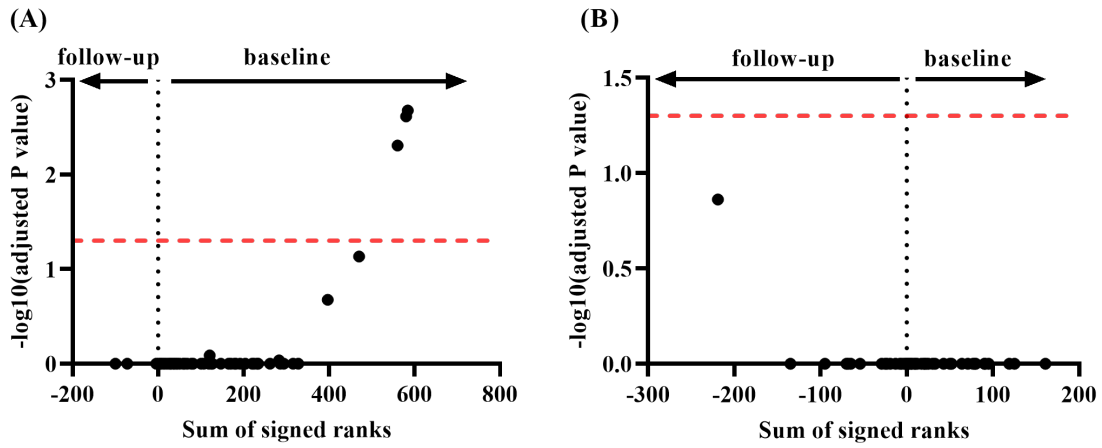

**Supplementary Figure 3. Stability over time.** Volcano plots of Wilcoxon matched-pairs signed rank test after Bonferroni-Dunn correction comparing serum levels of 65 cytokines, chemokines and related molecules between baseline and follow-up samples in **A** MOGAD and **B** NMOSD patients. The red dotted line indicates the significance level of  $p < 0.05$ .

**Supplementary Table 1.** Dysregulated cytokine/chemokine concentrations, which distinguished NMOSD and MOGAD from MS with 90% specificity.

| Cytokine/<br>chemokine | 90th<br>percentile<br>of MS<br>patients<br>(pg/ml) | NMOSD       | MOGAD       | MS          | p-value<br>(NMOSD<br>vs MS) | p-value<br>(MOGAD<br>vs MS) |
|------------------------|----------------------------------------------------|-------------|-------------|-------------|-----------------------------|-----------------------------|
| APRIL                  | 2567.92                                            | 18/40(45%)  | 5/40 (13%)  | 5/54 (9%)   | <0.001                      |                             |
| BAFF                   | 18.34                                              | 6/40 (15%)  | 6/40 (15%)  | 5/54 (9%)   |                             | <0.001                      |
| CD30                   | 671.02                                             | 21/40 (53%) | 9/40 (23%)  | 5/54 (9%)   | <0.001                      |                             |
| CD40L                  | 53.21                                              | 11/40 (28%) | 17/40 (43%) | 5/54 (9%)   | 0.002                       | <0.001                      |
| ENA-78                 | 411.74                                             | 17/40 (43%) | 8/40 (20%)  | 5/54 (9%)   | <0.001                      |                             |
| Eotaxin-2              | 466.51                                             | 13/40 (33%) | 10/40 (25%) | 5/54 (9%)   | <0.001                      | 0.007                       |
| Eotaxin-3              | 10.86                                              | 6/40 (15%)  | 3/40 (8%)   | 5/54 (9%)   |                             | 0.004                       |
| FGF-2                  | 4.54                                               | 4/40 (10%)  | 9/40 (23%)  | 1/54 (2%)   |                             | 0.001                       |
| Fractalkine            | 7.41                                               | 18/40 (45%) | 16/40 (40%) | 4/54 (7%)   | <0.001                      | <0.001                      |
| GRO- $\alpha$          | 10.88                                              | 16/40 (40%) | 28/40 (70%) | 5/54 (9%)   | <0.001                      | <0.001                      |
| HGF                    | 647.67                                             | 19/40 (48%) | 20/40 (50%) | 5/54 (9%)   | <0.001                      | <0.001                      |
| IL-10                  | 2.40                                               | 6/40 (15%)  | 12/40 (30%) | 4/54 (7%)   |                             | 0.006                       |
| IL-16                  | 455.41                                             | 1/40 (3%)   | 8/40 (20%)  | 5/54 (9%)   | <0.001                      |                             |
| IL-17A                 | 123.56                                             | 4/40 (10%)  | 9/40 (23%)  | 5/54 (9%)   |                             | <0.001                      |
| IL-18                  | 28.04                                              | 20/40 (50%) | 16/40 (40%) | 5/54 (9%)   | <0.001                      | <0.001                      |
| IL-1 $\alpha$          | 1.59                                               | 13/40 (33%) | 11/40 (28%) | 2/54 (4%)   | <0.001                      | <0.001                      |
| IL-21                  | 6.84                                               | 11/40 (28%) | 9/40 (23%)  | 1/54 (2%)   | <0.001                      | <0.001                      |
| IL-22                  | 19.95                                              | 9/40 (23%)  | 6/40 (15%)  | 2/54 (4%)   | 0.006                       |                             |
| IL-23                  | 16.19                                              | 3/40 (8%)   | 12/40 (30%) | 2/54 (4%)   |                             | <0.001                      |
| IL-27                  | 139.41                                             | 2/40 (5%)   | 12/40 (30%) | 5/54 (9%)   |                             | <0.001                      |
| IL-2R                  | 8697.27                                            | 14/40 (35%) | 6/40 (15%)  | 5/54 (9%)   | <0.001                      |                             |
| IL-3                   | 23.12                                              | 10/40 (25%) | 3/40 (8%)   | 1/54 (2%)   | <0.001                      |                             |
| IL-31                  | 12.33                                              | 3/40 (8%)   | 10/40 (25%) | 3 (54 (6%)) |                             | 0.010                       |
| IL-5                   | 9.09                                               | 5/40 (13%)  | 13/40 (33%) | 5/54 (9%)   |                             | <0.001                      |
| IL-6                   | 6.92                                               | 8/40 (20%)  | 15/40 (38%) | 5/54 (9%)   |                             | <0.001                      |
| IL-7                   | 8.39                                               | 6/40 (15%)  | 10/40 (25%) | 4/54 (7%)   | <0.001                      | <0.001                      |
| IL-8                   | 6.51                                               | 21/40 (53%) | 25/40 (63%) | 5/54 (9%)   | <0.001                      | <0.001                      |
| IL-9                   | 10.67                                              | 3/40 (8%)   | 8/40 (20%)  | 1/54 (2%)   |                             | 0.001                       |
| IP-10                  | 101.99                                             | 26/40 (65%) | 19/40 (48%) | 5/54 (9%)   | <0.001                      | <0.001                      |
| LIF                    | 42.83                                              | 3/40 (8%)   | 11/40 (28%) | 5/54 (9%)   |                             | <0.001                      |
| MCP-1                  | 346.64                                             | 18/40 (45%) | 26/40 (65%) | 5/54 (9%)   | <0.001                      | <0.001                      |
| MCP-2                  | 18.37                                              | 14/40 (35%) | 3/40 (8%)   | 5/54 (9%)   | <0.001                      |                             |
| M-CSF                  | 63.38                                              | 7/40 (18%)  | 11/40 (28%) | 0/54 (0%)   | 0.002                       | <0.001                      |
| MDC                    | 420.40                                             | 18/40 (45%) | 14/40 (35%) | 5/54 (9%)   | <0.001                      | <0.001                      |
| MIG                    | 15.56                                              | 14/40 (35%) | 11/40 (28%) | 5/54 (9%)   | <0.001                      | <0.001                      |
| MIP-1 $\alpha$         | 76.10                                              | 4/40 (10%)  | 12/40 (30%) | 5/54 (9%)   |                             | <0.001                      |
| MIP-1 $\beta$          | 20.14                                              | 19/40 (48%) | 19/40 (48%) | 5/54 (9%)   | <0.001                      | <0.001                      |
| MIP-3 $\alpha$         | 291.42                                             | 11/40 (28%) | 13/40 (33%) | 5/54 (9%)   | <0.001                      | <0.001                      |
| MMP-1                  | 5898.92                                            | 0/40 (0%)   | 14/40 (35%) | 5/54 (9%)   | 0.005                       | <0.001                      |
| SCF                    | 10.99                                              | 16/40 (40%) | 17/40 (43%) | 5/54 (9%)   | <0.001                      | <0.001                      |
| SDF-1 $\alpha$         | 10814.51                                           | 26/40 (65%) | 32/40 (80%) | 5/54 (9%)   | <0.001                      | <0.001                      |
| TNF- $\beta$           | 6.08                                               | 5/40 (13%)  | 14/40 (35%) | 3 (54 (6%)) |                             | <0.001                      |
| TNFR2                  | 230.93                                             | 22/40 (55%) | 2/40 (5%)   | 5/54 (9%)   | <0.001                      |                             |

|        |         |             |             |           |        |        |
|--------|---------|-------------|-------------|-----------|--------|--------|
| TRAIL  | 437.95  | 14/40 (35%) | 3/40 (8%)   | 5/54 (9%) | <0.001 |        |
| TWEAK  | 1731.21 | 24/40 (60%) | 12/40 (30%) | 5/54 (9%) | <0.001 | <0.001 |
| VEGF-A | 859.19  | 12/40 (30%) | 22/40 (55%) | 5/54 (9%) |        | <0.001 |

APRIL: a proliferation-inducing ligand; BAFF: B cell activation factor; BLC: B lymphocyte chemoattractant; CD40L: CD40 ligand; ENA-78: epithelial neutrophil-activating peptide-78; FGF: fibroblast growth factor; G-CSF: granulocyte colony-stimulating factor; GM-CSF: granulocyte-macrophage colony-stimulating factor; GRO: growth-regulated oncogene; HGF: hepatocyte growth factor; IFN: interferon; IL: interleukin; IP: interferon- $\gamma$ -induced protein; I-TAC: interferon-inducible T cell  $\alpha$ -chemoattractant; LIF: leukemia inhibitory factor; MCP: monocyte chemoattractant protein; M-CSF: macrophage colony-stimulating factor; MDC: macrophage-derived chemokine; MIF: macrophage migration inhibitory factor; MIG: monokine induced by interferon- $\gamma$ ; MIP: macrophage inflammatory protein; MMP: matrix metalloproteinase; MOGAD: myelin oligodendrocyte glycoprotein associated disease; MS: multiple sclerosis; NGF: nerve growth factor; NMDAR: N-methyl-D-aspartate receptor; NMOSD: neuromyelitis optica spectrum disorder; SCF: stem cell factor; SDF: stromal cell-derived factor; TNF: tumor necrosis factor; TRAIL: TNF-related apoptosis-inducing ligand; TSLP: thymic stromal lymphopoietin; TWEAK: tumor necrosis factor-like weak inducer of apoptosis; VEGF: vascular endothelial growth factor

**Supplementary Table 2.** Pearson's correlation coefficients comparing levels of cytokines, chemokines and related molecules measured with bead-based assay 1 with other bead-based assays.

| Analyte       | Bead-based assay 1 | Bead-based assay 2 | Bead-based assay 3 | Bead-based assay 4 |
|---------------|--------------------|--------------------|--------------------|--------------------|
| BLC           | 1.000              | n.a.               | n.a.               | 0.218              |
| G-CSF         | 1.000              | 0.312              | n.a.               | n.a.               |
| IFN- $\gamma$ | 1.000              | -0.012             | 0.455              | n.a.               |
| IL-10         | 1.000              | 0.224              | 0.424              | n.a.               |
| IL-12p70      | *                  | *                  | *                  | *                  |
| IL-13         | *                  | *                  | n.a.               | n.a.               |
| IL-16         | 1.000              | n.a.               | n.a.               | 0.214              |
| IL-17A        | 1.000              | 0.100              | 0.104              | *                  |
| IL-18         | 1.000              | n.a.               | -0.028             | n.a.               |
| IL-1 $\beta$  | 1.000              | 0.315              | 0.799              | n.a.               |
| IL-12         | 1.000              | 0.217              | n.a.               | n.a.               |
| IL-23         | 1.000              | n.a.               | 0.261              | n.a.               |
| IL-4          | 1.000              | 0.091              | n.a.               | n.a.               |
| IL-8          | 1.000              | n.a.               | 0.462              | 0.802              |
| IP-10         | 1.000              | n.a.               | n.a.               | 0.077              |
| MCP-1         | 1.000              | 0.357              | 0.325              | n.a.               |
| MDC           | 1.000              | n.a.               | n.a.               | 0.684              |
| TNF- $\alpha$ | 1.000              | 0.103              | 0.564              | n.a.               |

BLC: B lymphocyte chemoattractant; G-CSF: granulocyte colony-stimulating factor; IFN: interferon; IL: interleukin; IP: interferon- $\gamma$ -induced protein; MCP: monocyte chemoattractant protein; MDC: macrophage-derived chemokine; n.a.: not analyzed; TNF-related apoptosis-inducing ligand; \* analyte not detectable



**Supplementary Table 3.** Pearson's correlation coefficients comparing bead-based assays 2, 3 and 4.

| Reference          | Analyte       | Bead-based assay 1 | Bead-based assay 2 | Bead-based assay 3 | Bead-based assay 4 |
|--------------------|---------------|--------------------|--------------------|--------------------|--------------------|
| Bead-based assay 2 | G-CSF         | 0.312              | 1.000              | n.a.               | n.a.               |
| Bead-based assay 2 | IFN- $\gamma$ | -0.012             | 1.000              | 0.120              | n.a.               |
| Bead-based assay 2 | IL-10         | 0.224              | 1.000              | 0.264              | n.a.               |
| Bead-based assay 2 | IL-12p70      | *                  | 1.000              | 0.040              | n.a.               |
| Bead-based assay 2 | IL-13         | *                  | 1.000              | n.a.               | n.a.               |
| Bead-based assay 2 | IL-17A        | 0.100              | 1.000              | -0.112             | *                  |
| Bead-based assay 2 | IL-1 $\beta$  | 0.315              | 1.000              | 0.285              | n.a.               |
| Bead-based assay 2 | IL-12         | 0.217              | 1.000              | n.a.               | n.a.               |
| Bead-based assay 2 | IL-4          | 0.091              | 1.000              | n.a.               | n.a.               |
| Bead-based assay 2 | MCP-1         | 0.357              | 1.000              | 0.569              | n.a.               |
| Bead-based assay 2 | TNF- $\alpha$ | 0.103              | 1.000              | 0.205              | n.a.               |
| Bead-based assay 3 | IL-18         | -0.028             | n.a.               | 1.000              | n.a.               |
| Bead-based assay 3 | IL-23         | 0.261              | n.a.               | 1.000              | n.a.               |
| Bead-based assay 3 | IL-8          | 0.462              | n.a.               | 1.000              | 0.695              |
| Bead-based assay 4 | BLC           | 0.218              | n.a.               | n.a.               | 1.000              |
| Bead-based assay 4 | IL-16         | 0.214              | n.a.               | n.a.               | 1.000              |
| Bead-based assay 4 | IP-10         | 0.077              | n.a.               | n.a.               | 1.000              |
| Bead-based assay 4 | MDC           | 0.684              | n.a.               | n.a.               | 1.000              |

BLC: B lymphocyte chemoattractant; G-CSF: granulocyte colony-stimulating factor; IFN: interferon; IL: interleukin; IP: interferon- $\gamma$ -induced protein; MCP: monocyte chemoattractant protein; MDC: macrophage-derived chemokine; n.a.: not analyzed; TNF: tumor necrosis factor; \* analyte not detectable

**Supplementary Table 4.** Pearson's correlation coefficients comparing SDF-1 $\alpha$  levels.

|                    | Bead-based assay 1 | ELISA 6 | ELISA 7 | ELISA 8 |
|--------------------|--------------------|---------|---------|---------|
| Bead-based assay 1 | 1.000              | 0.095   | 0.137   | 0.043   |
| ELISA 6            | 0.095              | 1.000   | 0.397   | 0.693   |
| ELISA 7            | 0.137              | 0.397   | 1.000   | 0.049   |
| ELISA 8            | 0.043              | 0.693   | 0.049   | 1.000   |

SDF: stromal cell-derived factor

**Supplementary Table 5.** Cytokine-chemokine profile in different diseases affecting the central nervous system, either measured in blood (serum or plasma) (pink) or CSF (blue). We listed only cytokines and chemokines that are significantly different compared to control groups, which are the following: **A** healthy controls without infections/meningitis, **B** MS and NMOSD controls, **C** MS, **D** other non-inflammatory neurological disorders or non-SLE control group, **E** meningoencephalic phase versus 2 months follow-up of these patients, **F** meningoencephalic phase versus early phase without CNS symptoms, **G** non-NPSLE patients.

| Immune effector cells | Cytokines/chemokines   | MOGAD      | NMOSD      | Anti-NMDAR encephalitis | Viral encephalitis     | Bacterial meningitis | NPSLE                                           |        |
|-----------------------|------------------------|------------|------------|-------------------------|------------------------|----------------------|-------------------------------------------------|--------|
| Th1                   | IL-12p70               |            |            |                         |                        | A (1)                | A (1) B (2)                                     |        |
|                       | TNF- $\alpha$          | C, D (3)   |            | D (4, 5)                | E (6)                  | D (7), A (1)         | B (2)                                           |        |
|                       | MIG                    | C          | C          |                         | E (6), F (8)           | D (4)                |                                                 |        |
|                       | IP-10                  | C D (3)    | C B (8)    | D (4, 5)                | F (8)                  | D (4), A (9)         |                                                 |        |
|                       | IFN- $\gamma$<br>I-TAC | C, D (3)   | C (3)      | D (4, 5)                | F (8), A (10)<br>F (8) | D (7)                | D (7), A (11) B (2)                             |        |
| Th2                   | IL-2                   |            |            | D (12)                  |                        | D (7)                | B (2)                                           |        |
|                       | IL-4                   |            |            |                         |                        |                      |                                                 |        |
|                       | IL-5                   | C          |            |                         | A (13)                 |                      | B (2)                                           |        |
|                       | IL-13                  | C, D (3)   | C, D (3)   | D (4)                   | D (4, 14)              | D (15)               | B (2)                                           |        |
| T reg                 | IL-10                  | C C (3)    | C (3)      | D (4, 5)                | A (10)                 | D (4, 7)             | A (16, 7) D (7, 10), A (1, 11) G (17), B (2)    |        |
| Th17                  | IL-6                   | C C, (3) D | C, D (3)   | C (18) D (4)            | A (13, 10)             | D (4, 14, 7)         | D (7), A (1) D (7, 10), A (1, 11) D (19) G (17) |        |
|                       | IL-8                   | C C, (3) D | C C, (3) D | C (18)                  | A (13)                 | D (4, 14)            | A (1)                                           | G (17) |
|                       | IL-17A                 | C          |            |                         |                        |                      | A (16)                                          | B (2)  |
|                       | IL-23                  | C          |            | D (4)                   | D (4)                  | A (20)               |                                                 |        |
| B cells               | SDF-1 $\alpha$         | C          | C          | D (4)                   | D (4)                  |                      |                                                 |        |
|                       | BLC                    |            |            | D (4, 5)                | F (8)                  | D (4)                |                                                 |        |
|                       | APRIL                  | C (18)     | C          | C (18)                  |                        |                      |                                                 |        |
|                       | BAFF                   | C          |            |                         | F (8)                  | D (4)                |                                                 |        |

|                        |                |   |          |          |          |              |                      |              |
|------------------------|----------------|---|----------|----------|----------|--------------|----------------------|--------------|
| Broad spectrum/ Others | IFN- $\alpha$  | C |          |          | D (4)    | E (6), F (8) | D (4), A (9)         |              |
|                        | MCP-1          | C | C (3)    | C        | C (3)    |              | A (13), E (6), F (8) | G (21, 17)   |
|                        | MIP-1 $\beta$  | C | D (3)    | C        | D (3)    | C (18)       |                      |              |
|                        | IL-1 $\alpha$  | C | C, D (3) | C        | C, D (3) | D (4)        | D (4)                |              |
|                        | GRO- $\alpha$  | C |          | C        |          | C (18)       | F (8)                |              |
|                        | Fractalkine    | C |          | C        |          |              |                      | G (22)       |
|                        | IL-18          | C |          | C        |          |              | D (14)               | A (20)       |
|                        | TNF- $\beta$   | C |          | C        |          |              |                      |              |
|                        | IL-21          | C |          | C        |          |              | E (6)                |              |
|                        | MDC            | C |          | C        |          | D (5)        |                      |              |
|                        | IL-9           | C | D (3)    |          |          |              |                      | B (2)        |
|                        | FGF-2          | C | D (3)    | D (3)    |          |              |                      | A (23) B (2) |
|                        | Eotaxin-3      | C |          |          |          |              |                      |              |
|                        | Eotaxin-2      | C |          | C        |          |              |                      |              |
|                        | Eotaxin        |   |          |          |          |              |                      | B (2)        |
|                        | IL-31          | C |          |          |          |              |                      |              |
|                        | HGF            | C |          | C        |          |              | A (13)               |              |
|                        | SCF            | C |          | C        |          |              |                      |              |
|                        | VEGF-A         | C |          |          |          |              | A (13), F (8)        |              |
|                        | IL-7           | C |          | C        |          |              | D (14)               | B (2)        |
|                        | TWEAK          | C |          | C        |          |              |                      |              |
|                        | MIP-3 $\alpha$ | C |          | C        |          |              |                      |              |
|                        | M-CSF          | C |          | C        |          |              |                      |              |
|                        | G-CSF          |   |          |          |          |              |                      | G (17)       |
|                        | GM-CSF         |   |          |          |          |              | A (13)               | B (2)        |
|                        | CD40L          | C |          | C        |          |              |                      |              |
|                        | MMP-1          | C |          | C        |          |              |                      |              |
|                        | IL-27          | C |          |          |          |              | E (6)                |              |
|                        | LIF            | C |          |          |          |              |                      |              |
|                        | MIP-1 $\alpha$ | C | C, D (3) | C, D (3) |          | D (5)        |                      | D (15)       |

|        |   |  |       |           |        |              |
|--------|---|--|-------|-----------|--------|--------------|
| CD30   | C |  |       |           |        |              |
| TNFR2  | C |  |       |           |        |              |
| IL-16  | C |  | D (5) |           |        |              |
| IL-2R  | C |  |       |           |        |              |
| MCP-2  | C |  | D (5) |           |        |              |
| TRAIL  | C |  |       |           |        |              |
| ENA-78 | C |  |       |           |        |              |
| IL-3   | C |  |       |           |        |              |
| IL-22  | C |  |       |           |        |              |
| IL-15  |   |  |       |           |        | B (2)        |
| IL-20  |   |  |       |           |        |              |
| MIF    |   |  |       |           |        |              |
| TSLP   |   |  |       |           |        |              |
| MCP-3  |   |  |       |           |        |              |
| NGF-β  |   |  |       |           |        |              |
| IL-1β  |   |  | D (4) | D (4, 14) | A (16) | A (1) A (24) |

APRIL: a proliferation-inducing ligand; BAFF: B cell activation factor; BLC: B lymphocyte chemoattractant; CD40L: CD40 ligand; ENA-78: epithelial neutrophil-activating peptide-78; FGF: fibroblast growth factor; G-CSF: granulocyte colony-stimulating factor; GM-CSF: granulocyte-macrophage colony-stimulating factor; GRO: growth-regulated oncogene; HGF: hepatocyte growth factor; IFN: interferon; IL: interleukin; IP: interferon-γ-induced protein; I-TAC: interferon-inducible T cell α-chemoattractant; LIF: leukemia inhibitory factor; MCP: monocyte chemoattractant protein; M-CSF: macrophage colony-stimulating factor; MDC: macrophage-derived chemokine; MIF: macrophage migration inhibitory factor; MIG: monokine induced by interferon-γ; MIP: macrophage inflammatory protein; MMP: matrix metalloproteinase; MOGAD: myelin oligodendrocyte glycoprotein associated disease; MS: multiple sclerosis; NGF: nerve growth factor; NMDAR: N-methyl-D-aspartate receptor; NMOSD: neuromyelitis optica spectrum disorder; NPSLE: neuropsychiatric syndromes of systemic lupus erythematosus; SCF: stem cell factor; SDF: stromal cell-derived factor; TBE: tick-borne encephalitis; TNF: tumor necrosis factor; TRAIL: TNF-related apoptosis-inducing ligand; TSLP: thymic stromal lymphopoietin; TWEAK: tumor necrosis factor-like weak inducer of apoptosis; VEGF: vascular endothelial growth factor

## Supplementary references

1. Perdomo-Celis F, Torres MA, Ostos H, Gutierrez-Achury J, Molano V, Durán LF et al. Patterns of Local and Systemic Cytokines in Bacterial Meningitis and its Relation with Severity and Long-Term Sequelae. *Biomark Insights* 2015; 10:125–31.
2. Ichinose K, Arima K, Ushigusa T, Nishino A, Nakashima Y, Suzuki T et al. Distinguishing the cerebrospinal fluid cytokine profile in neuropsychiatric systemic lupus erythematosus from other autoimmune neurological diseases. *Clin Immunol* 2015; 157(2):114–20.
3. Kaneko K, Sato DK, Nakashima I, Ogawa R, Akaishi T, Takai Y et al. CSF cytokine profile in MOG-IgG<sup>+</sup> neurological disease is similar to AQP4-IgG<sup>+</sup> NMOSD but distinct from MS: a cross-sectional study and potential therapeutic implications. *J Neurol Neurosurg Psychiatry* 2018; 89(9):927–36.
4. Kothur K, Wienholt L, Mohammad SS, Tantsis EM, Pillai S, Britton PN et al. Utility of CSF Cytokine/Chemokines as Markers of Active Intrathecal Inflammation: Comparison of Demyelinating, Anti-NMDAR and Enteroviral Encephalitis. *PLoS One* 2016; 11(8):e0161656.
5. Liu J, Liu L, Kang W, Peng G, Di Yu, Ma Q et al. Cytokines/Chemokines: Potential Biomarkers for Non-paraneoplastic Anti-N-Methyl-D-Aspartate Receptor Encephalitis. *Front Neurol* 2020; 11:582296.
6. Bogovič P, Lusa L, Korva M, Lotrič-Furlan S, Resman-Rus K, Pavletič M et al. Inflammatory Immune Responses in Patients with Tick-Borne Encephalitis: Dynamics and Association with the Outcome of the Disease. *Microorganisms* 2019; 7(11).
7. Xu J, Jiang J, Zhang Y, Li W. Cytokine characteristic of cerebrospinal fluid from children with enteroviral meningitis compared to bacterial meningitis. *J Clin Lab Anal* 2020; 34(5):e23198.
8. Bogovič P, Kastrin A, Lotrič-Furlan S, Ogrinc K, Avšič Županc T, Korva M et al. Comparison of laboratory and immune characteristics of the initial and second phase of tick-borne encephalitis. *Emerg Microbes Infect* 2022; 11(1):1647–56.
9. Lee KY, Seol JH, Yi CH, Lee WH. Cerebrospinal fluid type I interferon and cytokine profiles in enteroviral meningitis according to the presence or absence of pleocytosis. *Pediatr Neonatol* 2021; 62(3):305–11.
10. Ye Q, Shao W-X, Shang S-Q, Shen H-Q, Chen X-J, Tang Y-M et al. Clinical Value of Assessing Cytokine Levels for the Differential Diagnosis of Bacterial Meningitis in a Pediatric Population. *Medicine (Baltimore)* 2016; 95(13):e3222.
11. Jafari M, Mohammadzadeh Jahani P, Choopanizadeh M, Jamalidoost M, Pourabbas B, Pouladfar G et al. Investigating the role of T helper related cytokines in cerebrospinal fluid for the differential diagnosis of bacterial meningitis in pre-treated paediatric patients. *Biomarkers* 2020; 25(2):171–8.
12. Byun J-I, Lee S-T, Moon J, Jung K-H, Sunwoo J-S, Lim J-A et al. Distinct intrathecal interleukin-17/interleukin-6 activation in anti-N-methyl-d-aspartate receptor encephalitis. *J Neuroimmunol* 2016; 297:141–7.
13. Palus M, Formanová P, Salát J, Žampachová E, Elsterová J, Růžek D. Analysis of serum levels of cytokines, chemokines, growth factors, and monoamine neurotransmitters in patients with tick-borne encephalitis: identification of novel inflammatory markers with implications for pathogenesis. *Journal of Medical Virology* 2015; 87(5):885–92.

14. Ygberg S, Fowler Å, Wickström R. Cytokine and Chemokine Expression in CSF May Differentiate Viral and Autoimmune NMDAR Encephalitis in Children. *J Child Neurol* 2016; 31(13):1450–6.
15. Kwon J-S, Park JH, Kim JY, Cha HH, Kim M-J, Chong YP et al. Diagnostic Usefulness of Cytokine and Chemokine Levels in the Cerebrospinal Fluid of Patients with Suspected Tuberculous Meningitis. *Am J Trop Med Hyg* 2019; 101(2):343–9.
16. Zheng K, Zhu L, Ding Y, Zhang X, Chen N, Liu G et al. Serum cytokine profile of pediatric patients with laboratory confirmed pneumococcal meningitis. *J Infect Public Health* 2021; 14(4):514–20.
17. Yoshio T, Okamoto H, Kurasawa K, Dei Y, Hirohata S, Minota S. IL-6, IL-8, IP-10, MCP-1 and G-CSF are significantly increased in cerebrospinal fluid but not in sera of patients with central neuropsychiatric lupus erythematosus. *Lupus* 2016; 25(9):997–1003.
18. Hofer LS, Mariotto S, Wurth S, Ferrari S, Mancinelli CR, Delogu R et al. Distinct serum and cerebrospinal fluid cytokine and chemokine profiles in autoantibody-associated demyelinating diseases. *Mult Scler J Exp Transl Clin* 2019; 5(2):2055217319848463.
19. Hirohata S, Kikuchi H. Role of Serum IL-6 in Neuropsychiatric Systemic lupus Erythematosus. *ACR Open Rheumatol* 2021; 3(1):42–9.
20. Srinivasan L, Kilpatrick L, Shah SS, Abbasi S, Harris MC. Elevations of novel cytokines in bacterial meningitis in infants. *PLoS One* 2018; 13(2):e0181449.
21. Duarte-García A, Romero-Díaz J, Juárez S, Cicero-Casarrubias A, Fragoso-Loyo H, Núñez-Alvarez C et al. Disease activity, autoantibodies, and inflammatory molecules in serum and cerebrospinal fluid of patients with Systemic Lupus Erythematosus and Cognitive Dysfunction. *PLoS One* 2018; 13(5):e0196487.
22. Sato E, Iikuni N, Yoshio T, Minota S, Kamatani N, Okamoto H. Soluble fractalkine in the cerebrospinal fluid of patients with neuropsychiatric lupus. *Annals of the Rheumatic Diseases* 2006; 65(9):1257–9.
23. Hoang TTT, Ichinose K, Morimoto S, Furukawa K, Le LHT, Kawakami A. Measurement of anti-suprabasin antibodies, multiple cytokines and chemokines as potential predictive biomarkers for neuropsychiatric systemic lupus erythematosus. *Clin Immunol* 2022; 237:108980.
24. Dellalibera-Joviliano R, Dos Reis ML, Cunha FdQ, Donadi EA. Kinins and cytokines in plasma and cerebrospinal fluid of patients with neuropsychiatric lupus. *The Journal of Rheumatology* 2003; 30(3):485–92.
